# Supplementary material
Source: PubMed Central journal article supplement (PMC6832869)
Supplement: NIHMS1540459-supplement-1.pdf [file NIHMS1540459-supplement-1.pdf]

## SUPPLEMENTAL DATA

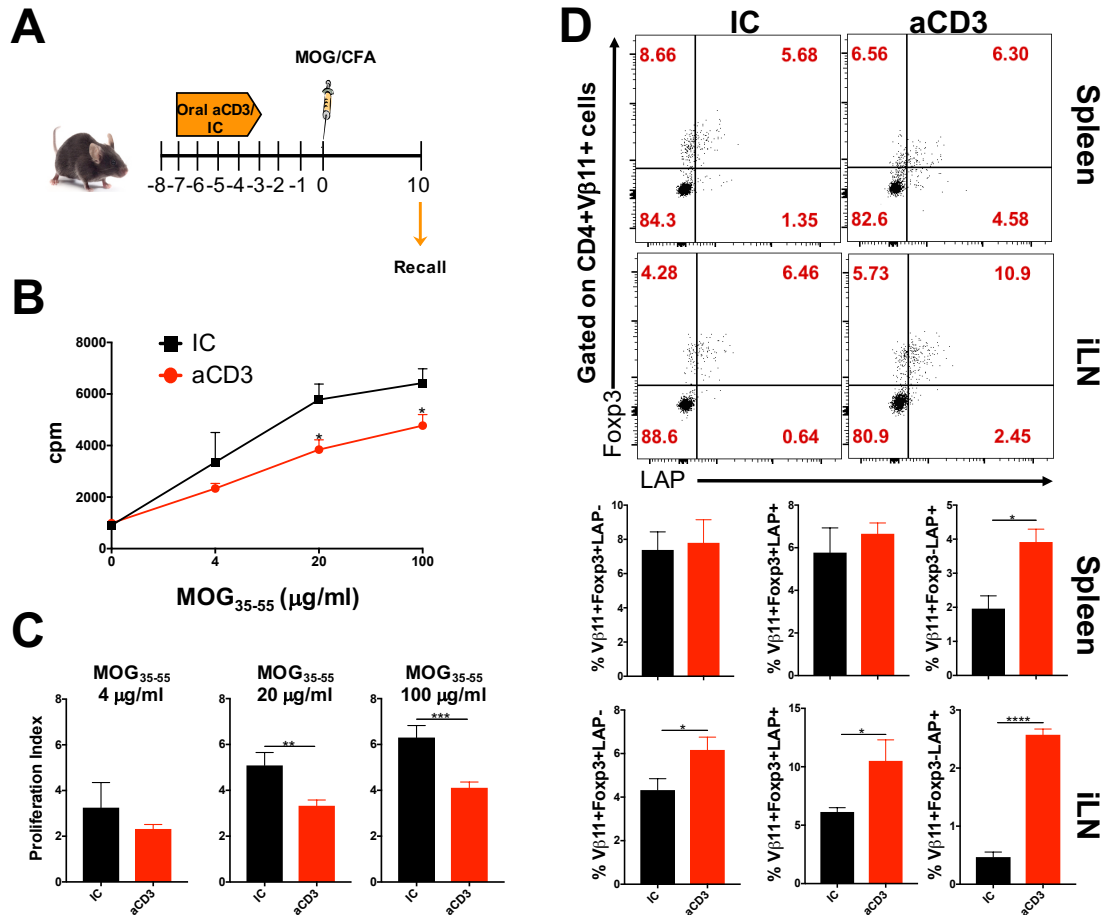

**Supplementary Figure 1. Increased MOG<sub>35-55</sub>-specific Treg cells after anti-CD3-induced oral tolerance.** (A) Scheme for oral administration of anti-CD3 (aCD3) or isotype control (IC), both given at 10 μg/mouse; MOG<sub>35-55</sub>/CFA immunization and recall assay. (B, C) Ten days after MOG<sub>35-55</sub>/CFA immunization, mice were sacrificed and spleens removed for recall assay. Splenocytes were stimulated in the presence of 4, 20 or 100 μg/ml of MOG<sub>35-55</sub> for three days and proliferation analyzed by H<sup>3</sup>-thymidine incorporation in counts per minute (cpm; B) or index (C; see methods for details); n=8-20 mice/group. (D) FACS plots showing Foxp3 and LAP expression in CD4+Vβ11+ cells from the spleen and inguinal lymph node (iLN); n=5 mice/group. Data are shown as mean ± SEM and are representative of three independent experiments. One-way ANOVA (B) or Student's t test (C, D) were used. \* p<0.05, \*\* p<0.01, \*\*\* p<0.001, \*\*\*\* p<0.0001.

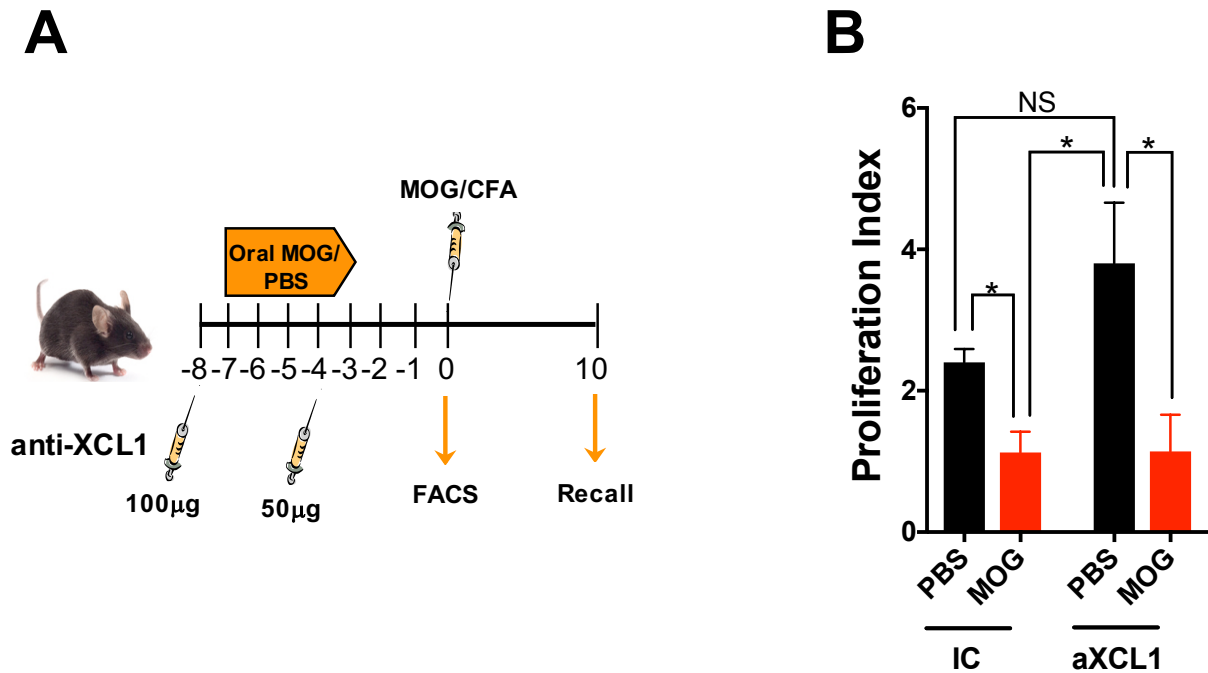

**Supplemental Figure 2. Anti-XCL1 monoclonal antibody administration does not affect oral tolerance induced by a fed antigen. (A)** Scheme for anti-XCL1 monoclonal antibody (mAb) administration, injected subcutaneously twice (100 and 50  $\mu\text{g}$ /mouse) on oral administration of MOG<sub>35-55</sub> (250  $\mu\text{g}$ /mouse) or PBS; MOG<sub>35-55</sub>/CFA immunization and recall assay. **(B)** Ten days after MOG<sub>35-55</sub>/CFA immunization, mice were sacrificed, and spleens removed for recall assay. Splenocytes were stimulated in the presence of 100  $\mu\text{g}/\text{ml}$  of MOG<sub>35-55</sub> for three days and proliferation index analyzed by H<sup>3</sup>-thymidine incorporation; n=5 mice/group. Data are shown as mean  $\pm$  SEM and are representative of two independent experiments. One-way ANOVA was used. NS=non-significant, \* p<0.05.

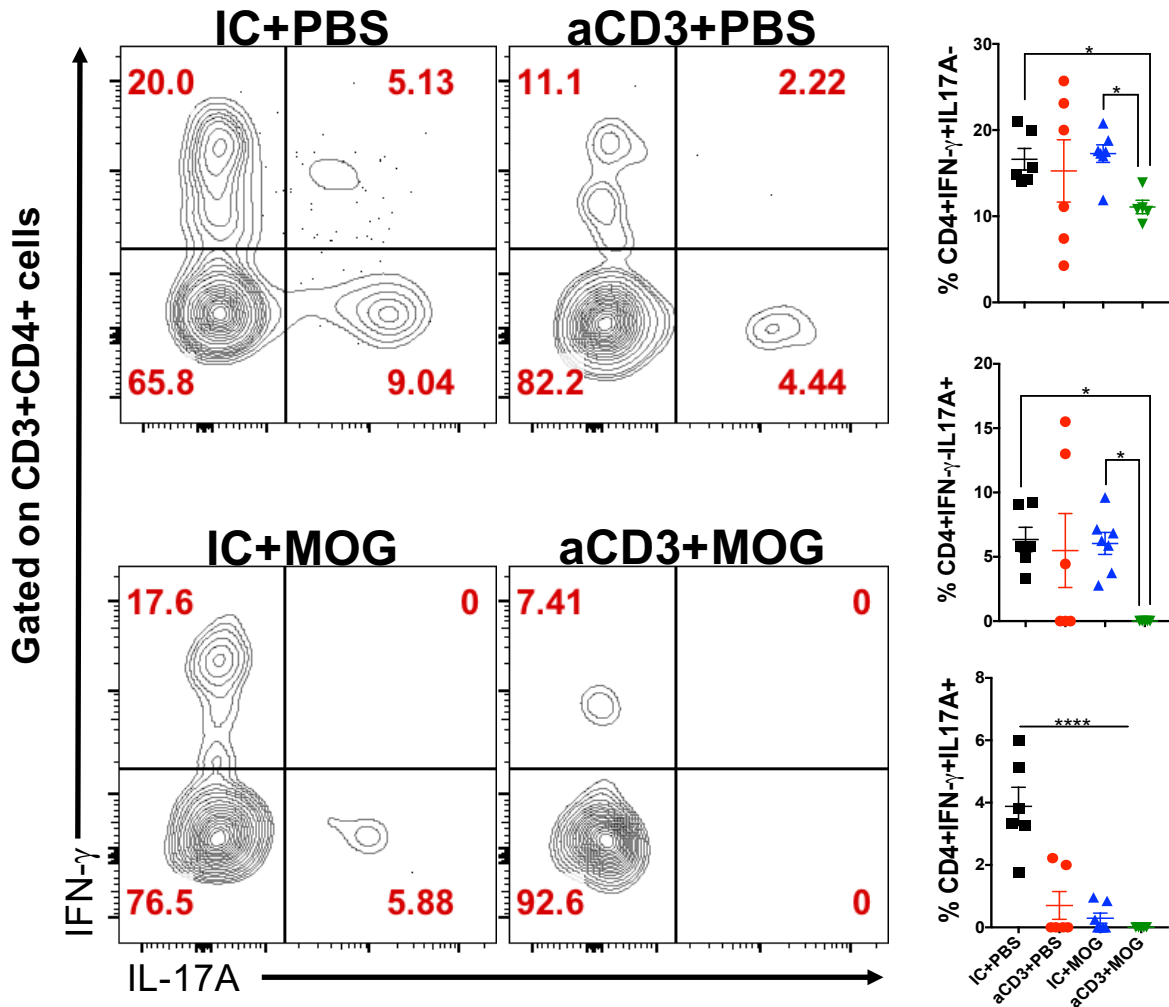

**Supplemental Figure 3. Decreased inflammation in the spinal cord of mice treated orally with both anti-CD3 and MOG<sub>35-55</sub>.** FACS plots showing IFN- $\gamma$  and IL-17A expression in infiltrating CD3+CD4+ T cells in the spinal cord of EAE-induced mice 18 days after immunization with MOG<sub>35-55</sub>/CFA. Mice were treated orally with either 10  $\mu$ g of anti-CD3 (aCD3) or 250  $\mu$ g of MOG<sub>35-55</sub> (MOG) alone or both together (or their respective vehicle controls alone or together) for five consecutive days and EAE induced three days after the last dose of aCD3 and MOG; n=6-7 mice/group. Data are shown as mean  $\pm$  SEM and are representative of two independent experiments. One-way ANOVA was used. \* p<0.05, \*\*\*\*p<0.0001.

## Spleen

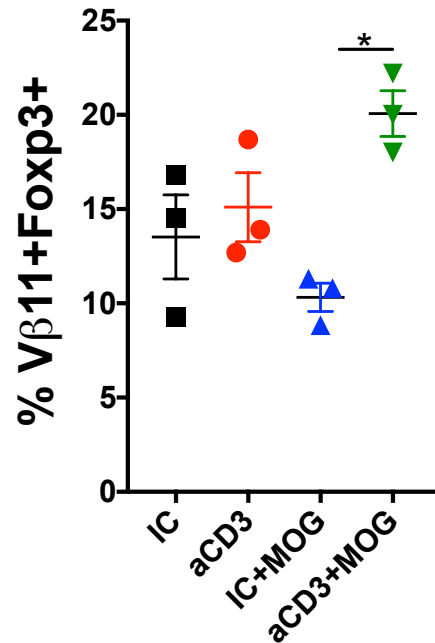

**Supplemental Figure 4. Increased Treg cell frequency following administration of both anti-CD3 and MOG<sub>35-55</sub>.** Scatter plot showing Foxp3 expression in CD3+CD4+Vβ11+ T cells in the spleen of EAE-induced mice 10 days after immunization with MOG<sub>35-55</sub>/CFA. Mice were treated orally with either 10 μg of anti-CD3 (aCD3) or 250 μg of MOG<sub>35-55</sub> (MOG) alone or both together (or their respective vehicle controls alone or together) for five consecutive days and EAE induced three days after the last dose of aCD3 and MOG; n=3 mice/group. Data are shown as mean ± SEM and are representative of two independent experiments. One-way ANOVA was used. \* p<0.05, \*\*\*\*p<0.0001.
